# Supplementary material for: Whole-transcriptome analysis links trastuzumab sensitivity of breast tumors to both HER2 dependence and immune cell infiltration
Source: PubMed Central journal article supplement (PMC4695052; doi:10.18632/oncotarget.4405), 2015-07-01
Supplement: oncotarget-06-28173-s001.pdf [file oncotarget-06-28173-s001.pdf]

SUPPLEMENTARY FIGURES AND TABLES

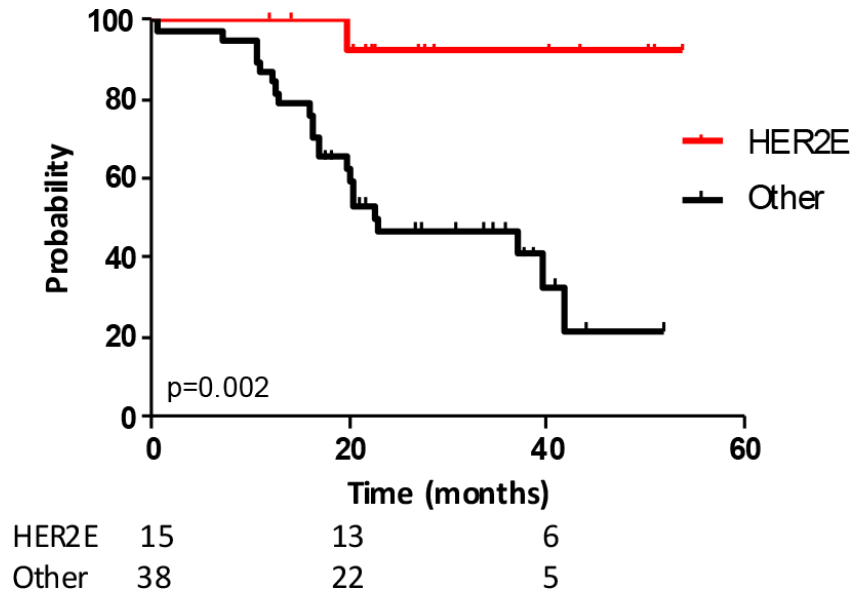

**Supplementary Figure S1: Prognostic value of PAM50 subtypes in the GHEA cohort.** Association between HER2E subtype (red) and other intrinsic subtypes (basal-like, luminal A and B, normal-like; black) with RFS in the GHEA53 dataset *p*-value by log-rank test.

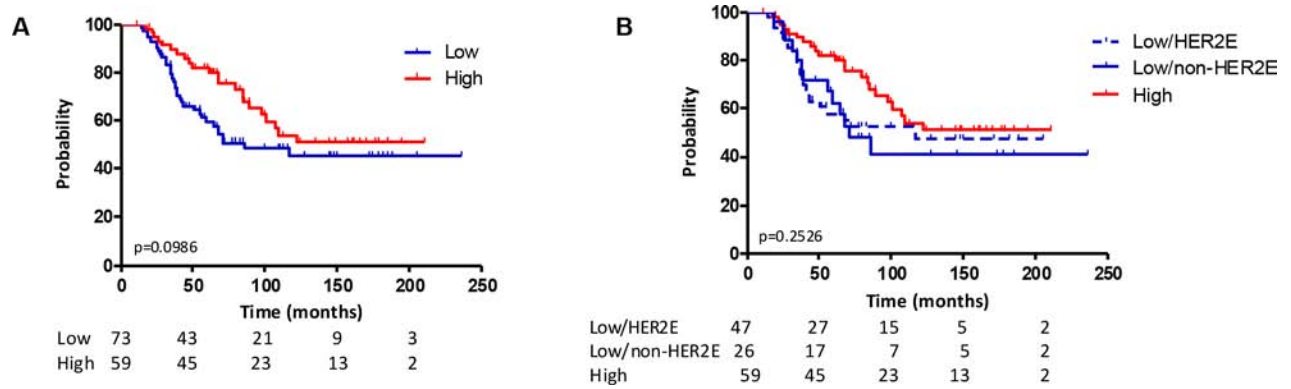

**Supplementary Figure S2: Prognostic significance of TRAR model.** Association between high- (red) and low-risk (blue) **A**, and high (red), low/non-HER2E (blue) and low/HER2E (dotted blue) **B**, with overall survival in HER2+ tumors of the Metabric dataset.  $p$ -value by log-rank test.

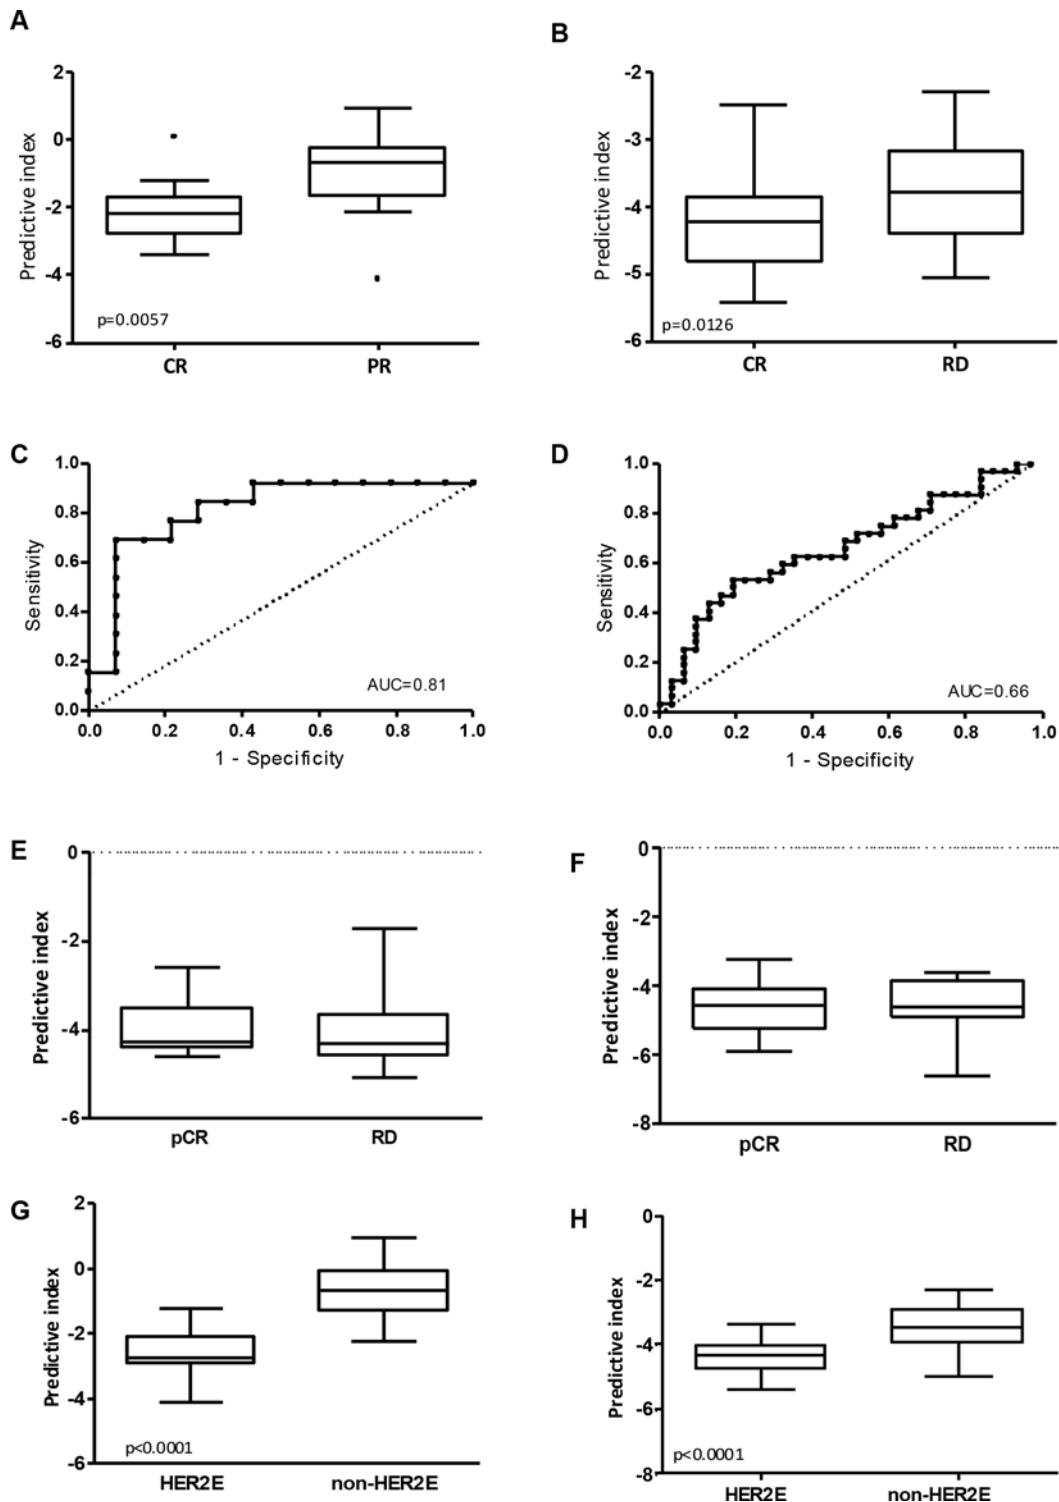

**Supplementary Figure S3: Validation of TRAR predictive significance in independent datasets.** **A, B.** Association between 41-gene predictive indices and response to trastuzumab neo-adjuvant therapy in HER2+ BCs of the GSE22358 (A) and GSE50948 (B) datasets. CR: complete or near complete response, PR: partial response RD: residual disease (number of CR GSE22358  $n = 14/27$ ; GSE50948  $n = 31/63$ ).  $p$ -values by unpaired  $t$ -test. **C, D.** Performance of the model: ROC curve of response prediction for the 41-gene model in GSE22358 (C) and GSE50948 (D) datasets. AUC: Area under the ROC curve. **E, F.** Association between TRAR indices and response to neo-adjuvant chemotherapy alone in HER2+ BCs of the GSE50948 (E) and GSE41656 (F) datasets. **G, H.** TRAR predictive indices of tumors classified as HER2E and non-HER2E in GSE22358 (G) and GSE41656 (H) datasets.  $p$ -values by unpaired  $t$ -test.

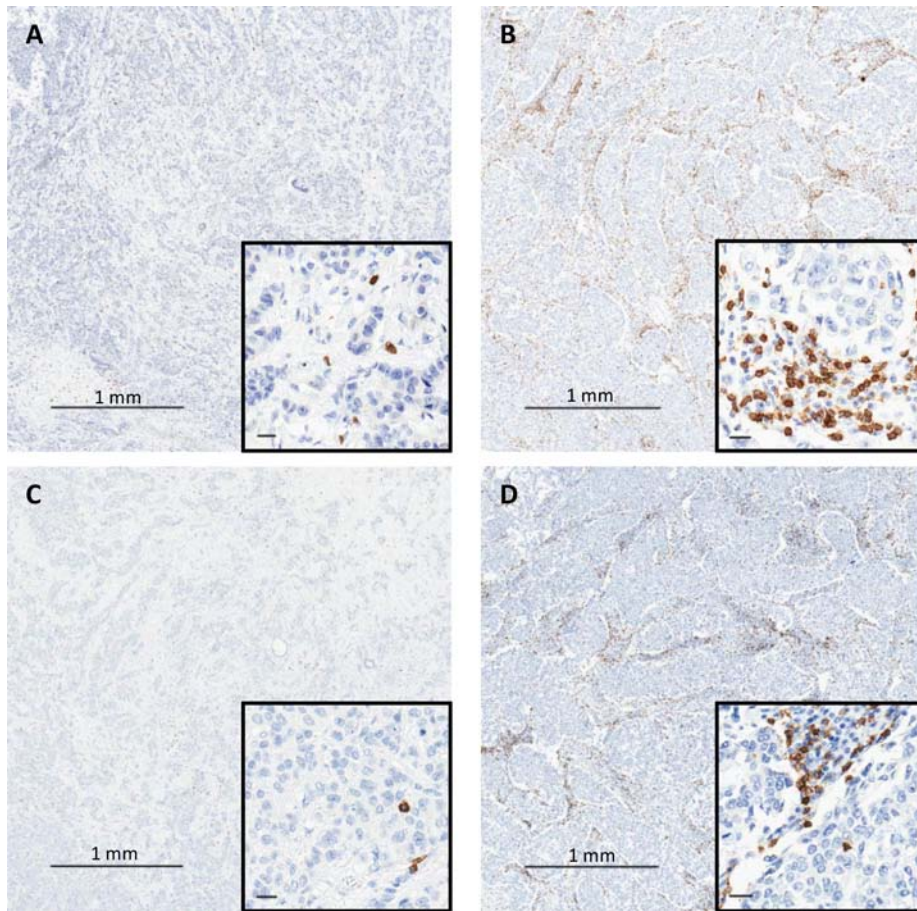

**Supplementary Figure S4: Immunohistochemical evaluation of CD3- and CD8-positive cells in tissues of GHEA cohort.** Representative images of CD3- and CD8-negative (A, C, respectively) and -positive (B, D, respectively) tumors. Scale bars in zoomed images, 20  $\mu$ m.

**Supplementary Table S1: List of 41 genes of TRAR model**

| Gene Symbol      | Gene name                                                        |
|------------------|------------------------------------------------------------------|
| C14orf173        | chromosome 14 open reading frame 173                             |
| C17orf37         | chromosome 17 open reading frame 37                              |
| <b>C1orf186*</b> | chromosome 1 open reading frame 186                              |
| C1QTNF7          | C1q and tumor necrosis factor related protein 7                  |
| C2orf48          | chromosome 2 open reading frame 48                               |
| CDK5R1           | cyclin-dependent kinase 5, regulatory subunit 1 (p35)            |
| CPA3             | carboxypeptidase A3 (mast cell)                                  |
| CPNE5            | copine V                                                         |
| CTSG             | cathepsin G                                                      |
| DBN1             | drebrin 1                                                        |
| DERL3            | derlin 3                                                         |
| <b>ERBB2*</b>    | v-erb-b2 erythroblastic leukemia viral oncogene homolog 2        |
| <b>ESR1*</b>     | estrogen receptor 1                                              |
| <b>GPC2*</b>     | glypican 2                                                       |
| <b>GRB7*</b>     | growth factor receptor-bound protein 7                           |
| HIST1H2BM        | histone cluster 1, H2bm                                          |
| IGFN1            | immunoglobulin-like and fibronectin type III domain containing 1 |
| INTS5            | integrator complex subunit 5                                     |
| KPNA5            | karyopherin alpha 5 (importin alpha 6)                           |
| LRRC8D           | leucine rich repeat containing 8 family, member D                |
| MANF             | mesencephalic astrocyte-derived neurotrophic factor              |
| MEX3A            | mex-3 homolog A (C. elegans)                                     |
| MS4A2            | membrane-spanning 4-domains, subfamily A, member 2               |
| <b>ODC1*</b>     | ornithine decarboxylase 1                                        |
| <b>ORMDL3*</b>   | ORM1-like 3 (S. cerevisiae)                                      |
| PGAP3            | post-GPI attachment to proteins 3                                |
| PLEKHA8          | pleckstrin homology domain containing, family A member 8         |
| PRDM1            | PR domain containing 1, with ZNF domain                          |
| PSMD3            | proteasome 26S subunit, non-ATPase, 3                            |
| <b>RERG*</b>     | RAS-like, estrogen-regulated, growth inhibitor                   |
| RGS13            | regulator of G-protein signaling 13                              |
| RIPK4            | receptor-interacting serine-threonine kinase 4                   |
| SLC18A2          | solute carrier family 18 (vesicular monoamine), member 2         |
| SLC8A3           | solute carrier family 8 (sodium/calcium exchanger), member 3     |
| SOX11            | SRY (sex determining region Y)-box 11                            |

(Continued)

| Gene Symbol    | Gene name                                             |
|----------------|-------------------------------------------------------|
| TCAP           | titin-cap (telethonin)                                |
| TNFRSF17       | tumor necrosis factor receptor superfamily, member 17 |
| TPSAB1         | tryptase alpha/beta 1                                 |
| TPSG1          | tryptase gamma 1                                      |
| <b>VPS37B*</b> | vacuolar protein sorting 37 homolog B (S. cerevisiae) |
| WASH2P         | WAS protein family homolog 2 pseudogene               |

\*TRAR core element

**Supplementary Table S2: Pathways enriched in tumors according to TRAR classification by GSEA analysis**

| Pathway                                                 | ES   | p-value | FDR     |
|---------------------------------------------------------|------|---------|---------|
| <b>TRAR-low vs TRAR-high</b>                            |      |         |         |
| M PHASE                                                 | 0.64 | <0.0001 | <0.0001 |
| M PHASE OF MITOTIC CELL CYCLE                           | 0.67 | <0.0001 | <0.0001 |
| MITOSIS                                                 | 0.66 | <0.0001 | <0.0001 |
| IMMUNE RESPONSE                                         | 0.56 | <0.0001 | <0.0001 |
| CELL CYCLE PROCESS                                      | 0.56 | <0.0001 | <0.0001 |
| CELL CYCLE PHASE                                        | 0.56 | <0.0001 | <0.0001 |
| IMMUNE SYSTEM PROCESS                                   | 0.52 | <0.0001 | <0.0001 |
| REGULATION OF MITOSIS                                   | 0.70 | <0.0001 | <0.0001 |
| MITOTIC CELL CYCLE                                      | 0.56 | <0.0001 | <0.0001 |
| POSITIVE REGULATION OF IMMUNE SYSTEM PROCESS            | 0.67 | <0.0001 | 0.0003  |
| CHROMOSOME SEGREGATION                                  | 0.68 | <0.0001 | 0.0009  |
| POSITIVE REGULATION OF MULTICELLULAR ORGANISMAL PROCESS | 0.60 | <0.0001 | 0.0011  |
| LYMPHOCYTE ACTIVATION                                   | 0.58 | <0.0001 | 0.0012  |
| CELL DIVISION                                           | 0.75 | <0.0001 | 0.0015  |
| REGULATION OF IMMUNE SYSTEM PROCESS                     | 0.58 | <0.0001 | 0.0014  |
| CELL CYCLE GO 0007049                                   | 0.46 | <0.0001 | 0.0017  |
| LEUKOCYTE ACTIVATION                                    | 0.56 | <0.0001 | 0.0035  |
| CELL ACTIVATION                                         | 0.55 | <0.0001 | 0.0033  |
| DEFENSE RESPONSE                                        | 0.46 | <0.0001 | 0.0041  |
| T CELL ACTIVATION                                       | 0.61 | <0.0001 | 0.0040  |
| POSITIVE REGULATION OF IMMUNE RESPONSE                  | 0.68 | <0.0001 | 0.0048  |
| POSITIVE REGULATION OF LYMPHOCYTE ACTIVATION            | 0.70 | <0.0001 | 0.0046  |
| POSITIVE REGULATION OF T CELL ACTIVATION                | 0.72 | <0.0001 | 0.0049  |
| CELLULAR DEFENSE RESPONSE                               | 0.58 | <0.0001 | 0.0052  |
| INFLAMMATORY RESPONSE                                   | 0.50 | <0.0001 | 0.0054  |
| CYTOKINESIS                                             | 0.74 | 0.0038  | 0.0054  |
| SISTER CHROMATID SEGREGATION                            | 0.73 | 0.0058  | 0.0083  |
| VIRAL GENOME REPLICATION                                | 0.68 | <0.0001 | 0.0098  |
| CELL CYCLE CHECKPOINT GO 0000075                        | 0.54 | <0.0001 | 0.0115  |
| ESTABLISHMENT OF ORGANELLE LOCALIZATION                 | 0.72 | 0.0021  | 0.0121  |
| POSITIVE REGULATION OF RESPONSE TO STIMULUS             | 0.56 | 0.0019  | 0.0244  |
| LOCOMOTORY BEHAVIOR                                     | 0.48 | <0.0001 | 0.0281  |
| VIRAL INFECTION CYCLE                                   | 0.58 | 0.0076  | 0.0287  |

(continued)

| Pathway                                                | ES   | <i>p</i> -value | FDR    |
|--------------------------------------------------------|------|-----------------|--------|
| <b>TRAR-low vs TRAR-high</b>                           |      |                 |        |
| HUMORAL IMMUNE RESPONSE                                | 0.61 | 0.0038          | 0.0322 |
| MITOTIC CELL CYCLE CHECKPOINT                          | 0.61 | 0.0019          | 0.0387 |
| ORGANELLE LOCALIZATION                                 | 0.60 | 0.0081          | 0.0478 |
| DNA RECOMBINATION                                      | 0.52 | 0.0059          | 0.0471 |
| BIOGENIC AMINE METABOLIC PROCESS                       | 0.66 | 0.0203          | 0.0459 |
| CYTOKINE AND CHEMOKINE MEDIATED SIGNALING PATHWAY      | 0.64 | 0.0100          | 0.0505 |
| RESPONSE TO VIRUS                                      | 0.52 | 0.0058          | 0.0508 |
| REGULATION OF LYMPHOCYTE ACTIVATION                    | 0.55 | 0.0096          | 0.0498 |
| DNA REPLICATION                                        | 0.44 | 0.0019          | 0.0492 |
| VIRAL REPRODUCTION                                     | 0.54 | 0.0080          | 0.0517 |
| INTERPHASE OF MITOTIC CELL CYCLE                       | 0.48 | <0.0001         | 0.0546 |
| REGULATION OF CELL CYCLE                               | 0.40 | <0.0001         | 0.0557 |
| INTERPHASE                                             | 0.46 | 0.0039          | 0.0561 |
| VIRAL REPRODUCTIVE PROCESS                             | 0.55 | 0.0073          | 0.0579 |
| RESPONSE TO OTHER ORGANISM                             | 0.46 | 0.0057          | 0.0665 |
| REGULATION OF T CELL ACTIVATION                        | 0.57 | 0.0181          | 0.0666 |
| REGULATION OF IMMUNE RESPONSE                          | 0.55 | 0.0225          | 0.0712 |
| DNA METABOLIC PROCESS                                  | 0.37 | <0.0001         | 0.0731 |
| NEGATIVE REGULATION OF DNA METABOLIC PROCESS           | 0.60 | 0.0290          | 0.0991 |
| POSITIVE REGULATION OF TRANSLATION                     | 0.54 | 0.0233          | 0.0992 |
| REGULATION OF CYCLIN DEPENDENT PROTEIN KINASE ACTIVITY | 0.48 | 0.0100          | 0.0975 |
| REGULATION OF KINASE ACTIVITY                          | 0.39 | <0.0001         | 0.095  |
| DNA INTEGRITY CHECKPOINT                               | 0.54 | 0.0187          | 0.0947 |



**Supplementary Table S3: Frequency of clinico-pathological characteristics of GHEA patients according to relapse**

| Variable                                                  | Relapsed ( <i>n</i> = 23) | Non-relapsed ( <i>n</i> = 30) | <sup>‡</sup> <i>p</i> -value |       |
|-----------------------------------------------------------|---------------------------|-------------------------------|------------------------------|-------|
| Median age, y (range)                                     | 52 (32–67)                | 55 (35–69)                    | 0.451                        |       |
| Tumor size, <i>T1</i>                                     | 8 (35%)                   | 13 (43%)                      | 0.581                        |       |
| Lymph node status, <i>positive</i>                        | 21 (91%)                  | 25 (83%)                      | 0.685                        |       |
| Histological grade, <i>III</i>                            | 18 (78%)                  | 21 (70%)                      | 0.547                        |       |
| Estrogen receptor, <i>positive</i>                        | 13 (57%)                  | 19 (63%)                      | 0.778                        |       |
| Progesteron receptor, <i>positive</i>                     | 9 (39%)                   | 15 (50%)                      | 0.579                        |       |
| Ki67, <i>positive</i>                                     | 19 (83%)                  | 20 (67%)                      | 0.225                        |       |
| Neo-adjuvant chemotherapy<br><i>A+T+CMF</i><br><i>CMF</i> | 9 (39%)<br>0              | 7 (23%)<br>1 (3%)             | 0.366                        |       |
| Adjuvant chemotherapy<br><i>A</i><br><i>T</i>             | 0<br>0                    | 5 (17%)<br>2 (7%)             |                              |       |
| <i>A+T</i><br><i>CMF</i>                                  | 12 (52%)<br>2 (9%)        | 15 (50%)<br>0                 |                              | 0.088 |
| Hormone therapy, <i>yes</i>                               | 12 (52%)                  | 16 (53%)                      |                              | 1.000 |
| Median trastuzumab<br>duration, cycles (range)            | 18 (5–30)                 | 18 (12–19)                    |                              | 0.974 |

<sup>‡</sup>*p*-value is calculated by Fisher exact test.

**Supplementary Table S4: Frequency of clinico-pathological characteristics of TRUP patients according to response**

| Variable                              | Responders ( <i>n</i> = 6) | Non-responders ( <i>n</i> = 18) | <sup>†</sup> <i>p</i> -value |
|---------------------------------------|----------------------------|---------------------------------|------------------------------|
| Tumor size, <i>T1 and T2</i>          | 5 (83%)                    | 11 (61%)                        | 0.6214                       |
| Lymph node status, <i>positive</i>    | 2 (50%)                    | 6 (37%)                         | 1.0000                       |
| Histological grade, <i>III</i>        | 5 (83%)                    | 14 (78%)                        | 1.0000                       |
| Estrogen receptor, <i>positive</i>    | 1 (17%)                    | 11 (61%)                        | 0.1550                       |
| Progesteron receptor, <i>positive</i> | 1 (17%)                    | 6 (33%)                         | 0.6287                       |
